# Supplementary material for: One-pot synthesis of poly(l-lactide)-b-poly(methyl methacrylate) block copolymers
Source: Royal Society of Chemistry journal article supplement (doi:10.1039/c4ra17202g), 2015-01-01
Supplement: c4ra17202g1.pdf [file c4ra17202g1.pdf]

## One-pot Synthesis of Poly(*l*-lactide)-*b*-Poly(methyl methacrylate)

### Block Copolymer

Junzhe Song, Jinbao Xu, Stergios Pispas, Guangzhao Zhang

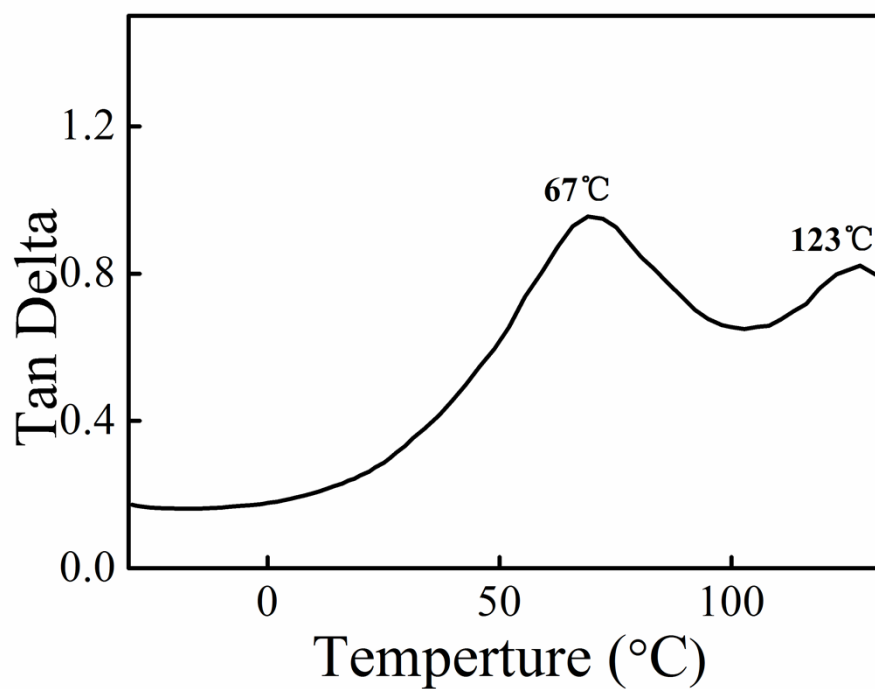

**Fig. S1.** DMA curve of PLA-*b*-PMMA copolymer.

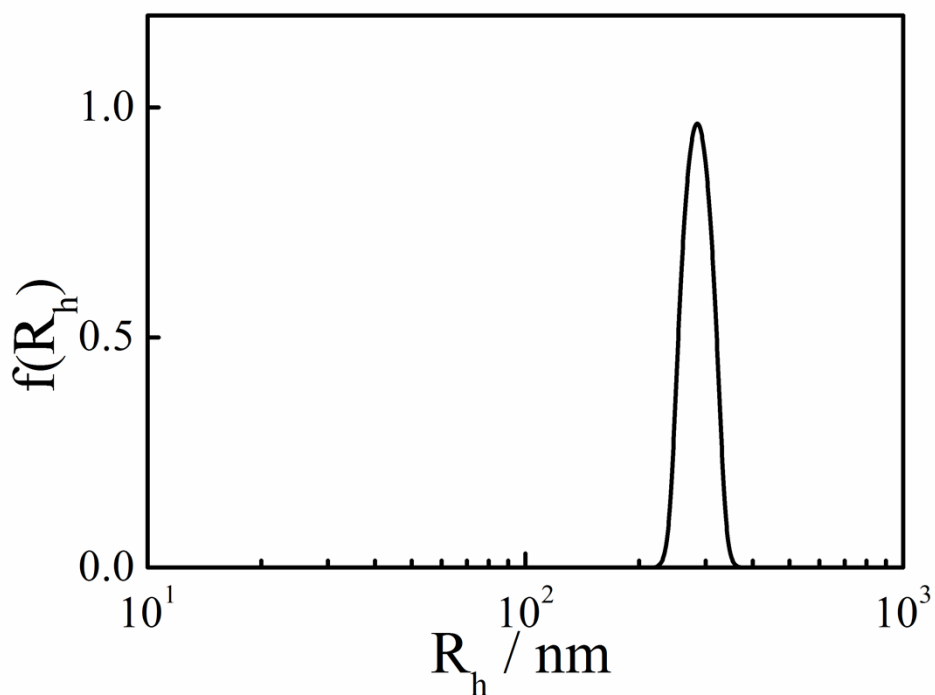

**Fig. S2.** Hydrodynamic radius distribution of the PLA-*b*-PMMA micelles in ethanol/water (80/20 wt %) solvent mixture at 25 °C.

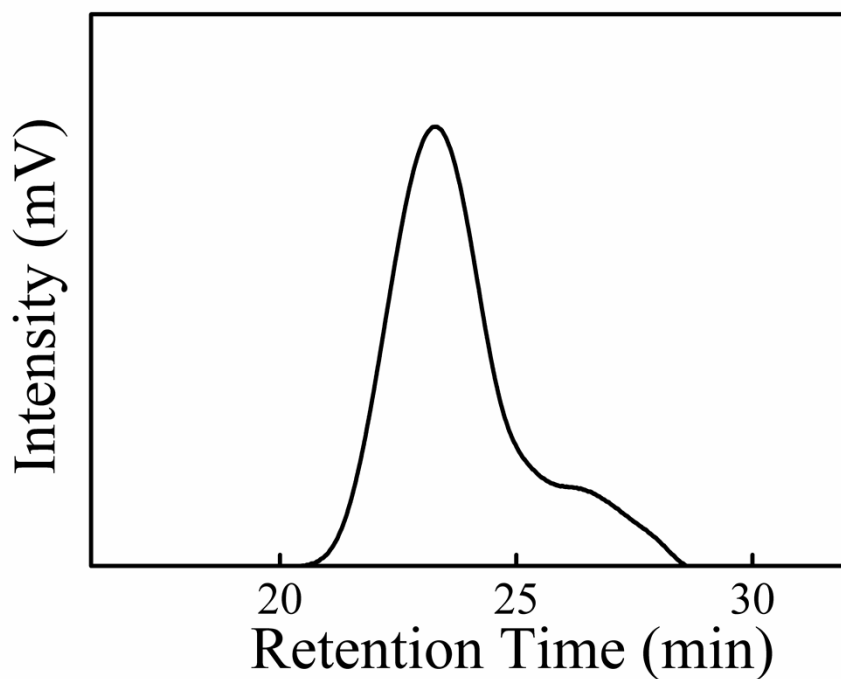

**Fig. S3.** SEC curves of PTMC-*b*-PS.

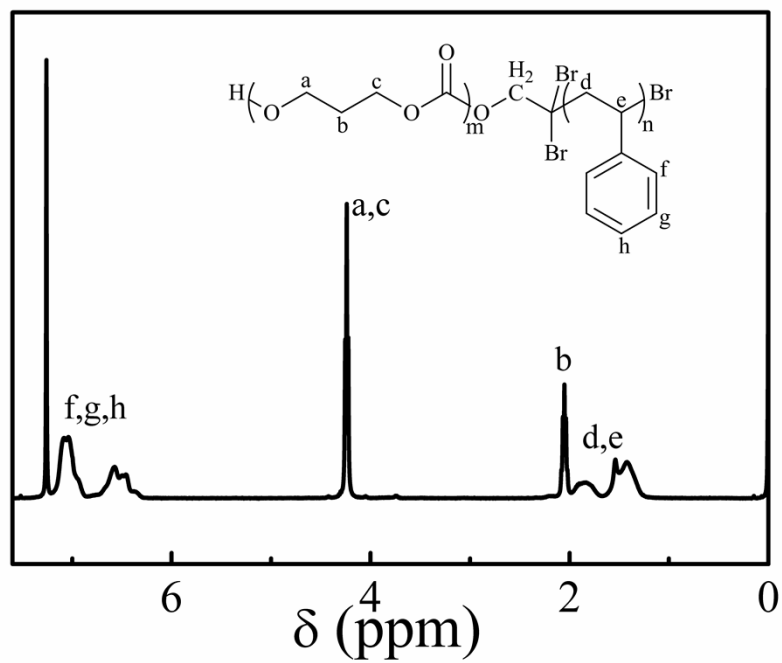

**Fig. S4.** <sup>1</sup>H NMR spectrum (in CDCl<sub>3</sub>) of PTMC-*b*-PS.

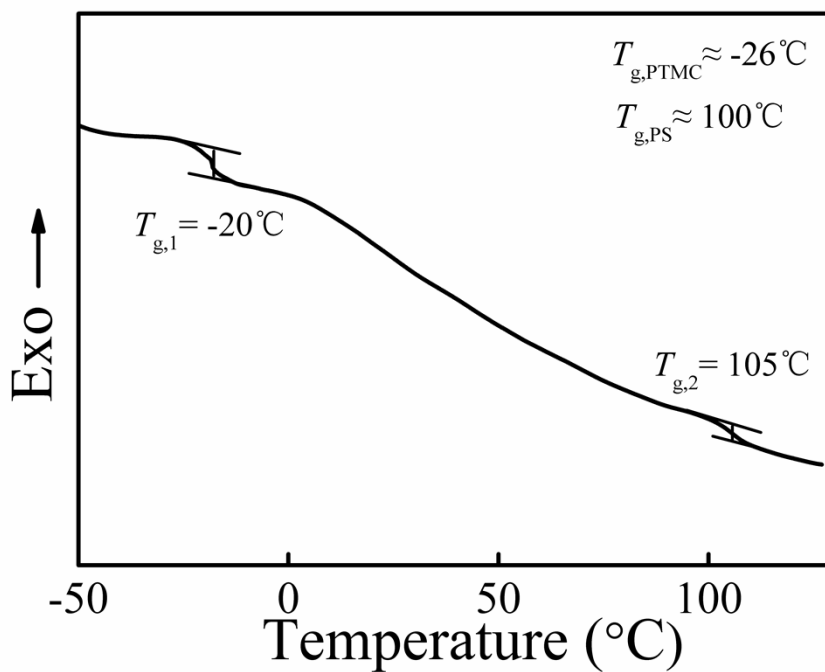

**Fig. S5.** DSC curve of PTMC-*b*-PS.
